# Supplementary material for: Largely enhanced energy storage capability of a polymer nanocomposite utilizing a core-satellite strategy
Source: Royal Society of Chemistry journal article supplement (doi:10.1039/c8nr05295f), 2018-01-01
Supplement: c8nr05295f1.pdf [file c8nr05295f1.pdf]

## **Largely enhanced energy storage capability of polymer nanocomposite utilizing a core-satellite strategy**

Zhongbin Pan\*<sup>a,b</sup>, Mingkun Wang<sup>a</sup>, Jianwen Chen<sup>c</sup>, Bo Shen<sup>b</sup>, Jinjun Liu\*<sup>a</sup> and Jiwei Zhai\*<sup>b</sup>

<sup>a</sup>School of Materials Science and Chemical Engineering, Ningbo University, Ningbo, Zhejiang, 315211, China.

<sup>b</sup>Key Laboratory of Advanced Civil Engineering Materials, Ministry of Education, School of Materials Science & Engineering, Tongji University, 4800 Caoan Road, Shanghai 201804, China.

<sup>c</sup>School of Electronic and Information Engineering, Foshan University, Foshan, 528000, China.

\*E-mail: panzhongbin@163.com (Zhongbin Pan) apzhai@tongji.edu.cn (Jiwei Zhai), liujinjun1@nbu.edu.cn (Jinjun Liu)

## Supporting information 1

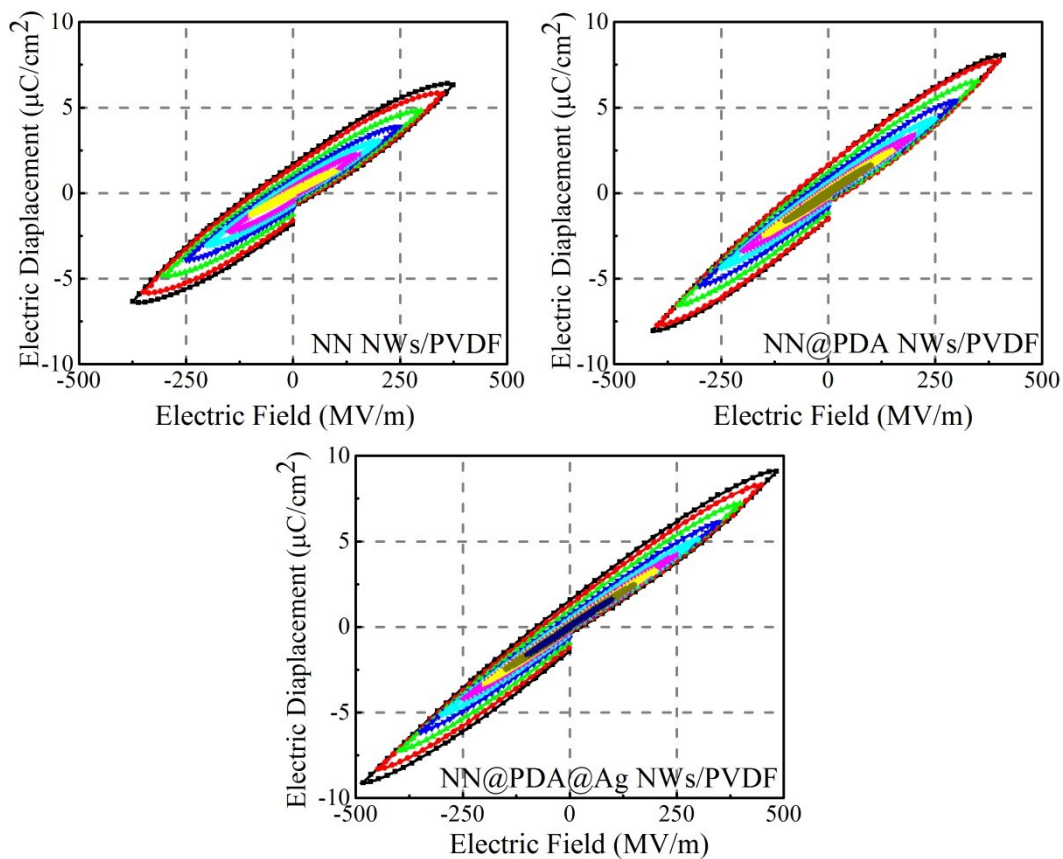

**Figure S1** D-E curves of composite films loaded with 3 vol % NN NWs, 3 vol % NN@PDA NWs, and 3 vol % NN@PDA@Ag NWs

## Supporting information 2

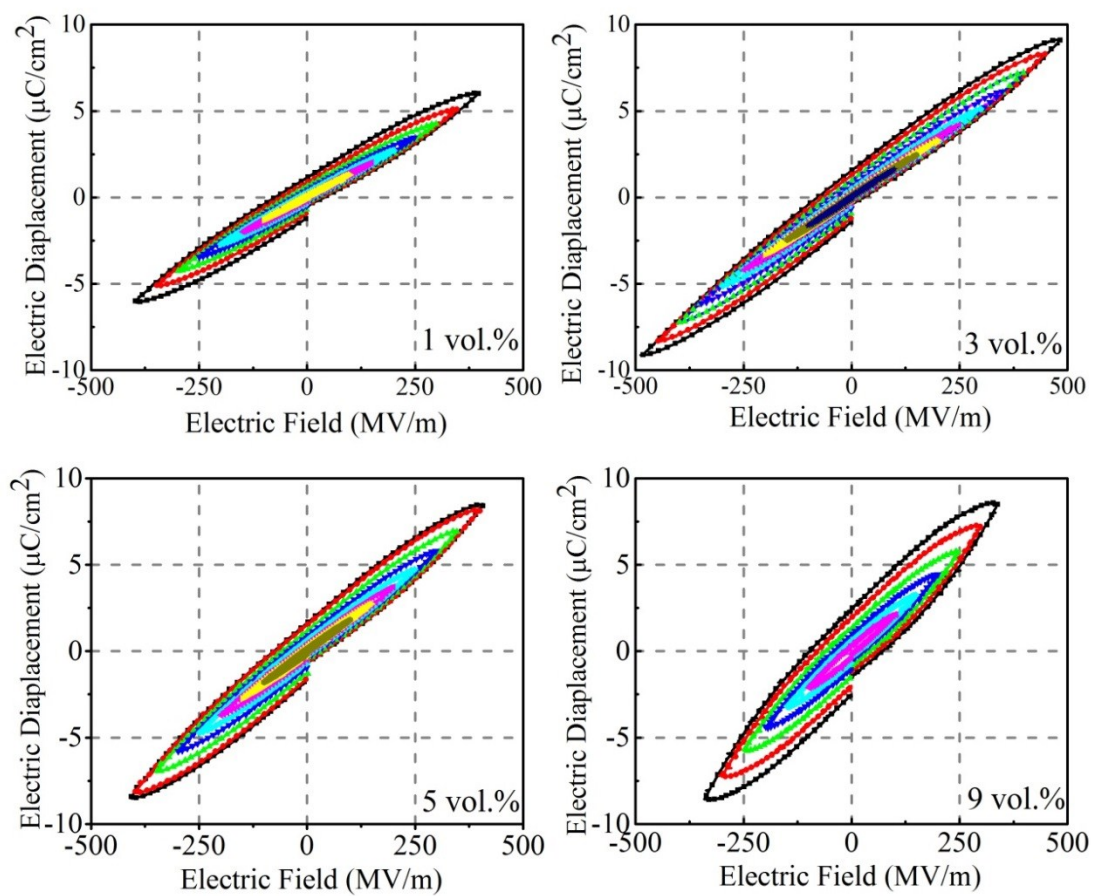

**Figure S2** D-E curves of composite films loaded with different contents of NN@PDA@Ag NWs.

### Supporting information 3

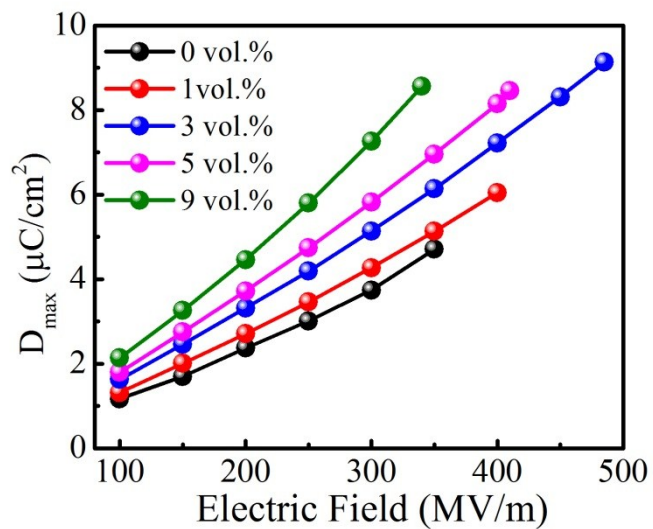

**Figure S3**  $D_{\max}$  of composite films filled with different contents of NN@PDA@Ag NWs.

#### Supporting information 4

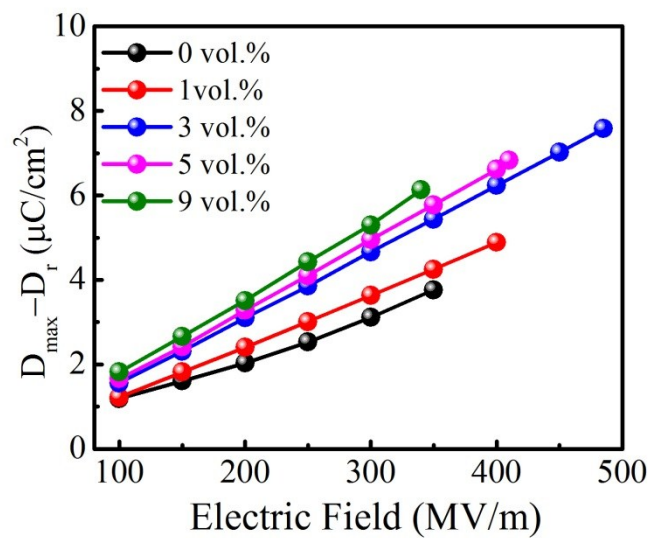

**Figure S4**  $D_{\max} - D_r$  of composite films filled with different contents of NN@PDA@Ag NWs.
